# Supplementary material for: Simultaneously Predicting the Pharmacokinetics of CES1-Metabolized Drugs and Their Metabolites Using Physiologically Based Pharmacokinetic Model in Cirrhosis Subjects
Source: MDPI journal article supplement (doi:10.3390/pharmaceutics16020234), 2024-02-05
Supplement: s1 [file s1]

The specific formulation of the semi-PBPK model is shown below.

It was assumed that no absorption and metabolism of drugs occurs in stomach. The amount ( $A_0$ ) in stomach is controlled by the constant of gastric emptying rate ( $K_{t0}$ ), i.e

$$\frac{dA_0}{dt} = -K_{t0} \times A_0 \quad (S1)$$

Small intestine is divided into duodenum, jejunum and ileum, which is further divided into the gut lumen and the gut wall. Drug amount ( $A_i$ ) in the  $i^{\text{th}}$  gut lumen is illustrated by

$$\frac{dA_i}{dt} = K_{t,i-1} \times A_{i-1} - K_{ti} \times A_i - k_{a,i} \times A_i \quad (S2)$$

Where  $K_{t,i}$  represents the constant of intestinal transit rate.  $k_{a,i}$  represents the absorption rate constant from the gut lumen to the gut wall, which may be calculated using equation,

$$k_{ai} = \frac{2 \times P_{\text{eff},A-B}}{r_i} \quad (S3)$$

Where  $r_i$  is the intestinal radius.  $P_{\text{eff},A-B}$  is effective permeability coefficient ( $P_{\text{eff}}$ ) from gut lumen to gut wall. The  $P_{\text{eff}}$  ( $\times 10^{-4}$ ) values were estimated using the in vitro apparent permeability coefficient of drugs ( $P_{\text{app}} \times 10^{-6}$ ) in Caco-2 cells based the equation[1]:

$$\text{Log}P_{\text{eff}} = 0.4926 \times \text{Log}P_{\text{app,Caco-2}} - 0.1454 \quad (S4)$$

The drug concentration in the  $i^{\text{th}}$  gut wall ( $C_{\text{GWi}}$ ) is expressed as follows:

$$\frac{V_{\text{GWi}} \times dC_{\text{GWi}}}{dt} = k_{a,i} \times A_i + Q_{\text{GWi}} \times C_{\text{sys}} - Q_{\text{GWi}} \times C_{\text{GWi}} \times R_b / K_{\text{G:P}} \quad (S5)$$

Where  $Q_{\text{GWi}}$  and  $K_{\text{G:P}}$  represent the blood flow rate in  $i^{\text{th}}$  gut wall and ratio of drug concentration in intestinal wall to plasma, respectively.  $C_{\text{GWi}}$  and  $V_{\text{GWi}}$  represent separately drug concentration in the  $i^{\text{th}}$  intestinal and wall volume of the  $i^{\text{th}}$  gut wall.  $C_{\text{sys}}$  represent drug concentrations in the systemic compartment.  $R_b$  is the ratio of drug concentrations in blood to plasma.

The drug enters the liver through the portal vein and the concentration in the portal vein ( $C_{\text{PV}}$ ) is:

$$\frac{V_{\text{PV}} \times dC_{\text{PV}}}{dt} = \sum Q_{\text{GWi}} \times C_{\text{GWi}} \times R_b / K_{\text{G:P}} - Q_{\text{PV}} \times C_{\text{PV}} \quad (S6)$$

$Q_{\text{PV}}$  and  $C_{\text{PV}}$  represent portal vein blood flow rate and volume of portal vein, respectively.

It was assumed that metabolism of CES1-mediated drugs mainly occurs in liver. Drug concentration ( $C_L$ ) in liver is illustrated by

$$\frac{V_L \times dC_L}{dt} = Q_{\text{PV}} \times C_{\text{PV}} + Q_{\text{LA}} \times C_{\text{sys}} - Q_L \times C_L \times R_b / K_{\text{L:P}} - \text{CL}_{\text{int}} \times f_{u,b} \times C_L \times R_b / K_{\text{L:P}} \quad (S7)$$

Where  $Q_{\text{LA}}$  and  $Q_L$  represent the hepatic artery blood flow rate to the liver and hepatic blood flow to the systemic compartment, respectively.  $V_L$  and  $K_{\text{L:P}}$  represent the volume of liver and ratio of drug concentration in liver to plasma, respectively.  $\text{CL}_{\text{int}}$  and  $f_{u,b}$  represent intrinsic clearance in the liver and free fraction of drug in blood, respectively.  $f_{u,b}$  is generated from the fraction unbound in plasma ( $f_{u,p}$ ), i.e

$$f_{u,b} = \frac{f_{u,p}}{R_b} \quad (S8)$$

$\text{CL}_{\text{int}}$  can be estimated using in vitro enzyme kinetics from human hepatic microsomes.

$$\text{CL}_{\text{int}} = \sum \frac{V_{\text{max},i}}{K_{m,i} + f_{u,b} \times \frac{A_L \times R_b}{V_L \times K_{\text{L:P}}}} \approx \sum \frac{V_{\text{max},i}}{K_{m,i}} \quad (S9)$$

Where  $V_{\text{max},i}$  and  $K_{m,i}$  represent the maximum velocity and Michaelis-Menten constant in vitro enzyme kinetic experiments, respectively.

Hepatic clearance ( $\text{CL}_L$ ) of a drug may be derived from total CL ( $\text{CL}_T$ ) and renal CL ( $\text{CL}_K$ ), i.e

$$\text{CL}_L = \text{CL}_T - \text{CL}_K \quad (S10)$$

Thus, The  $\text{CL}_{\text{int}}$  is also recalculated by hepatic blood clearance ( $\text{CL}_{L,b}$ ) using equation

$$\text{CL}_{L,b} = \frac{Q_L \times f_{u,b} \times \text{CL}_{\text{int}}}{Q_L + f_{u,b} \times \text{CL}_{\text{int}}} \quad (S11)$$

The CL values by clinic are often plasma clearance of drug ( $\text{CL}_p$ ), which may be transferred to blood clearance ( $\text{CL}_b$ ) using equation 12.

$$CL_b = \frac{CL_p}{1 - Hct + R_b \times Hct} \quad (S12)$$

Where Hct is hematocrit, 0.43 in healthy subjects[2].

Some metabolites of some drugs are also eliminated via bile. Amount of metabolites ( $A_{L,m}$ ) in liver is illustrated by equation 13.

$$\frac{V_L \times dC_{L,m}}{dt} = Q_{PV} \times C_{PV,m} + Q_{LA} \times C_{sys,m} + CL_{int,CSE1} \times f_{u,b} \times C_L \times R_b / K_{L:P} - Q_L \times C_{L,m} \times R_{b,m} / K_{L:P,m} - (CL_{int,m} + CL_{int,b,m}) \times f_{u,b,m} \times C_{L,m} \times R_{b,m} / K_{L:P,m} \quad (S13)$$

Where  $CL_{int,b,m}$  and  $CL_{int,m}$  are intrinsic bile clearance and intrinsic metabolic clearance, respectively. If metabolism of the metabolite did not occur in the body, the  $CL_{int,b,m}$  may be recalculated from  $CL_K$  using equations 10 and 11.

Kidney is involved in elimination of drugs, especially their metabolites. Amount of drugs in kidney is illustrated by equation

$$\frac{V_K \times dC_K}{dt} = Q_K \times C_{sys} - (Q_K + f_{u,b} \times CL_{int,K}) \times C_K \times R_b / K_{K:P} \quad (S14)$$

Where  $Q_K$  and  $V_K$  represent kidney blood flow and volume of the kidney, respectively.  $CL_{int,K}$  and  $K_{K,P}$  represent intrinsic clearance in kidney and tissue-to-plasma concentration ratio in the kidney, respectively.  $CL_{int,K}$  was also estimated from  $CL_K$  using equation 11.

Disposition of drugs in the systemic compartment is illustrated using one-compartment, two-compartment model or three-compartment model.

For one-compartment model

Drug concentration ( $C_{sys}$ ) in systemic compartment

$$\frac{V_{sys} \times dC_{sys}}{dt} = Q_L \times C_L \times R_b / K_{L:P} + Q_K \times C_K \times R_b / K_{K:P} - (Q_{LA} + Q_K) \times C_{sys} - \sum Q_{GWi} \times C_{sys} \quad (S15)$$

For two-compartment model

Drug concentration ( $C_{sys}$ ) in systemic compartment.

$$\frac{V_{sys} \times dC_{sys}}{dt} = Q_L \times C_L \times R_b / K_{L:P} + Q_K \times C_K \times R_b / K_{K:P} + k_{21} \times A_p - k_{12} \times V_{sys} \times C_{sys} - (Q_K + Q_{LA}) \times C_{sys} - \sum Q_{GWi} \times C_{sys} \quad (S16)$$

$$\frac{dA_p}{dt} = k_{12} \times V_{sys} \times C_{sys} - k_{21} \times A_p \quad (S17)$$

For three-compartment model

Drug concentration ( $C_{sys}$ ) in systemic compartment.

$$\frac{V_{sys} \times dC_{sys}}{dt} = Q_L \times C_L \times R_b / K_{L:P} + Q_K \times C_K \times R_b / K_{K:P} + k_{21} \times A_{p1} - k_{12} \times V_{sys} \times C_{sys} + k_{31} \times A_{p2} - k_{13} \times V_{sys} \times C_{sys} - (Q_K + Q_{LA}) \times C_{sys} - \sum Q_{GWi} \times C_{sys} \quad (S18)$$

$$\frac{dA_{p1}}{dt} = k_{12} \times V_{sys} \times C_{sys} - k_{21} \times A_{p1} \quad (S19)$$

$$\frac{dA_{p2}}{dt} = k_{13} \times V_{sys} \times C_{sys} - k_{31} \times A_{p2} \quad (S20)$$

Where  $V_{sys}$  represents the apparent distribution volume in systemic compartment.  $A_p$  and  $A_{p1}$  are the amount of drug in two peripheral compartments.  $k_{12}$ ,  $k_{21}$ ,  $k_{13}$  and  $k_{31}$  represent the transfer rates between the systemic compartment and peripheral compartment.

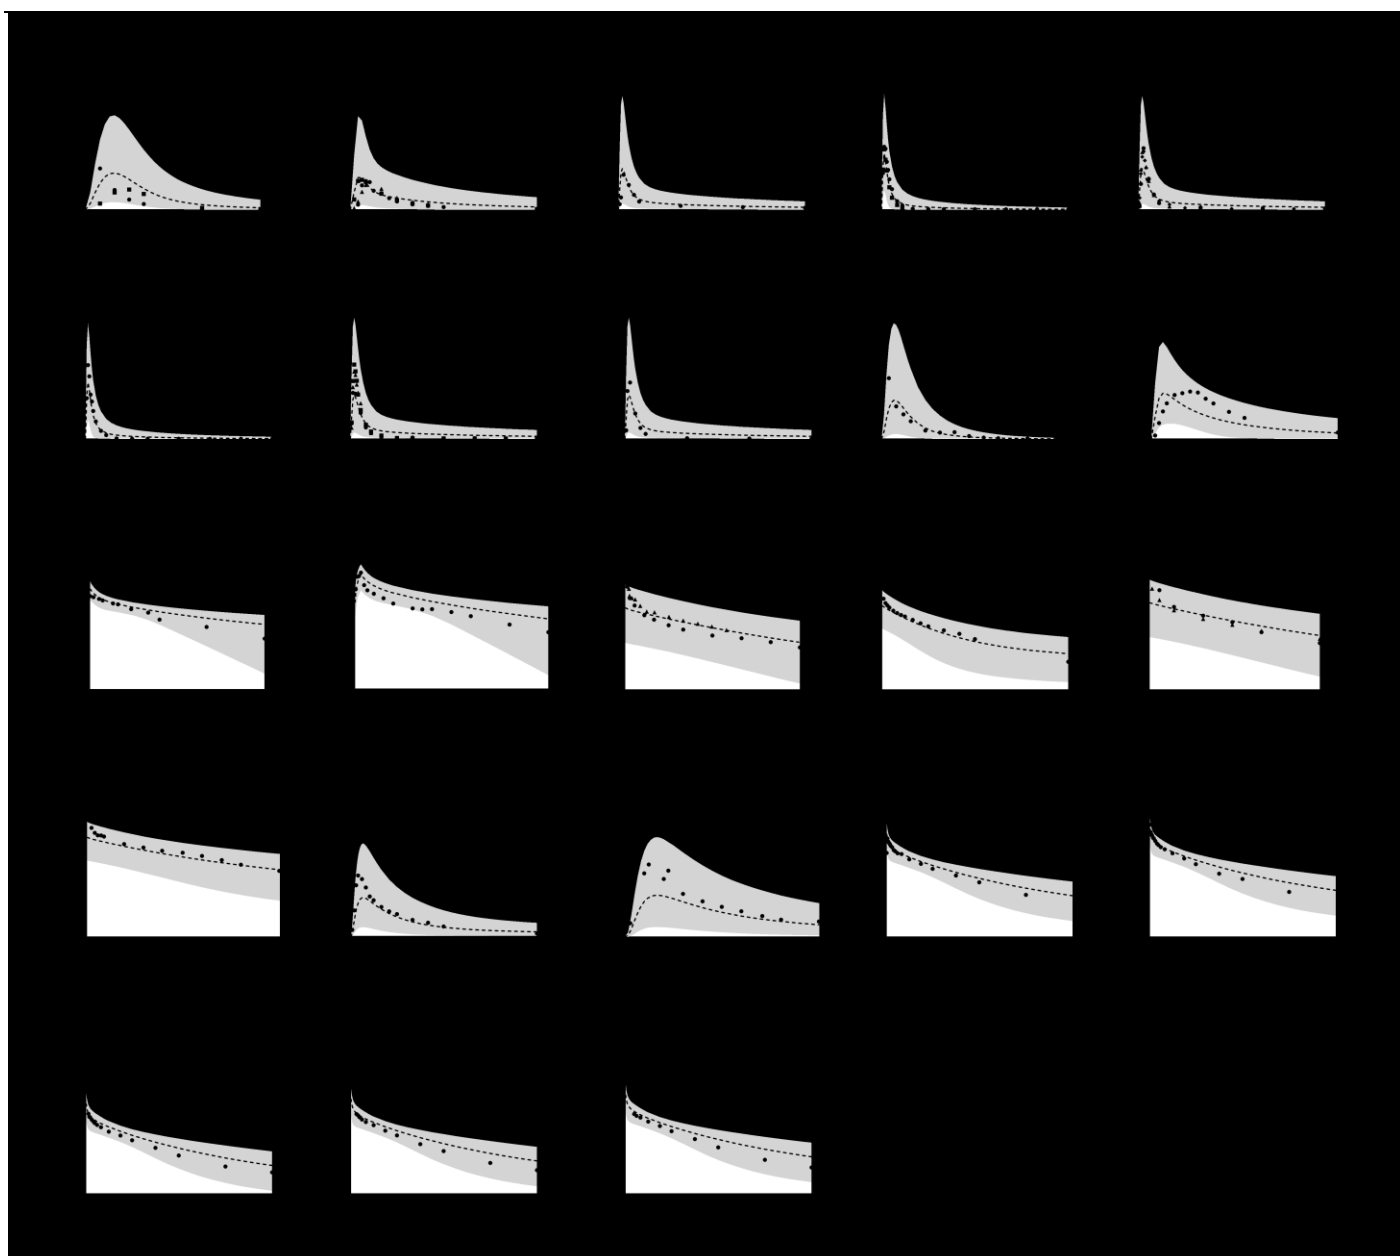

**Figure S1.** The observed (points) and predicted (lines) plasma concentrations of the tested CES1 substrates and their active metabolites following intravenous or oral administration to healthy subjects. Benazepril **(A)**[3,4] and benazeprilat **(B)**[3-5] following oral 10 mg benazepril hydrochloride; cilazapril **(D, F)**[6,7] and cilazaprilat **(C, E, G, H)**[6-9] following oral 1.25, 2.5, 5, 10 mg cilazapril; oseltamivir **(I)**[10] and oseltamivir carboxylate **(J)**[10] following oral 150 mg oseltamivir phosphate; flumazenil following intravenous 10 mg/1 min **(K)**[11] and 10mg/10min **(L)**[12]; pethidine following intravenous 50 mg/1min **(M)**[13], 25mg/1min **(N)**[14], 0.8mg/kg,1min **(O)**[15] and 0.8mg/kg,5min **(P)**[16]; pethidine hydrochloride and oral 25 mg **(Q)**[14], 0.8mg/kg **(R)**[16] pethidine hydrochloride; remimazolam following intravenous 0.05 **(S)**[17], 0.075 **(T)**[17], 0.2 **(U)**[17], 0.3 **(V)**[17], 0.4 **(W)**[17] mg/kg remimazolam besylate. Shaded areas indicate the 5th and 95th percentiles of simulations derived from 1000 virtual individuals. The dashed lines indicate the mean of the simulated profiles.

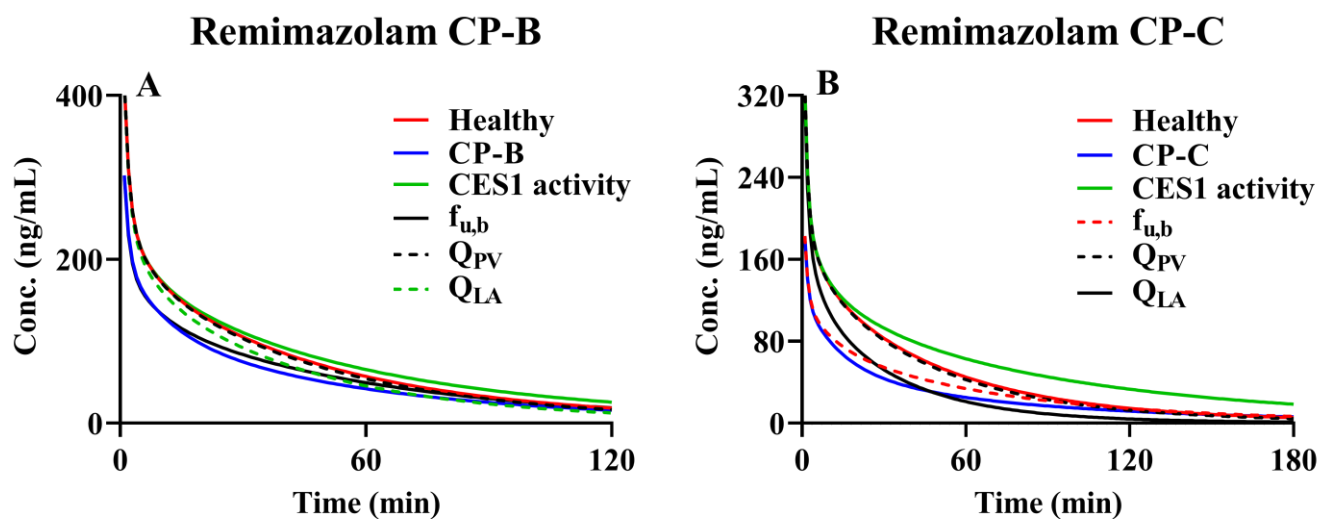

**Figure S2.** Contributions of LC-induced alterations in  $f_{u,b}$ , CES1 activity,  $Q_{LA}$  and  $Q_{PV}$  to plasma concentration of remimazolam following 10.4mg (CP-B, A) and 8.2mg (CP-C, B) administration to healthy human and LC patients.

## References:

1. Gertz, M.; Harrison, A.; Houston, J.B.; Galetin, A. Prediction of human intestinal first-pass metabolism of 25 CYP3A substrates from in vitro clearance and permeability data. *Drug Metab Dispos* **2010**, *38*, 1147–1158, doi:10.1124/dmd.110.032649.
2. Edginton, A.N.; Willmann, S. Physiology-based simulations of a pathological condition: prediction of pharmacokinetics in patients with liver cirrhosis. *Clin Pharmacokinet* **2008**, *47*, 743–752, doi:10.2165/00003088-200847110-00005.
3. Kaiser, G.; Ackermann, R.; Brechbuhler, S.; Dieterle, W. Pharmacokinetics of the angiotensin converting enzyme inhibitor benazepril.HCl (CGS 14 824 A) in healthy volunteers after single and repeated administration. *Biopharm Drug Dispos* **1989**, *10*, 365–376, doi:10.1002/bdd.2510100404.
4. Schweizer, C.; Kaiser, G.; Dieterle, W.; Mann, J. Pharmacokinetics and pharmacodynamics of benazepril hydrochloride in patients with major proteinuria. *Eur J Clin Pharmacol* **1993**, *44*, 463–466, doi:10.1007/BF00315544.
5. Macdonald, N.J.; Sioufi, A.; Howie, C.A.; Wade, J.R.; Elliott, H.L. The effects of age on the pharmacokinetics and pharmacodynamics of single oral doses of benazepril and enalapril. *Br J Clin Pharmacol* **1993**, *36*, 205–209, doi:10.1111/j.1365-2125.1993.tb04218.x.
6. Massarella, J.; DeFeo, T.; Lin, A.; Limjuco, R.; Brown, A. The pharmacokinetics and dose proportionality of cilazapril. *Br J Clin Pharmacol* **1989**, *27 Suppl 2*, 199S–204S, doi:10.1111/j.1365-2125.1989.tb03482.x.
7. Williams, P.E.; Brown, A.N.; Rajaguru, S.; Francis, R.J.; Bell, A.J.; Dewland, P.M. Pharmacokinetics of cilazapril during repeated oral dosing in healthy young volunteers. *Eur J Drug Metab Pharmacokinet* **1990**, *15*, 63–67, doi:10.1007/BF03190129.
8. Francis, R.J.; Brown, A.N.; Kler, L.; Fasanella d'Amore, T.; Nussberger, J.; Waeber, B.; Brunner, H.R. Pharmacokinetics of the converting enzyme inhibitor cilazapril in normal volunteers and the relationship to enzyme inhibition: development of a mathematical model. *J Cardiovasc Pharmacol* **1987**, *9*, 32–38.
9. Massarella, J.W.; DeFeo, T.M.; Brown, A.N.; Lin, A.; Wills, R.J. The influence of food on the pharmacokinetics and ACE inhibition of cilazapril. *Br J Clin Pharmacol* **1989**, *27 Suppl 2*, 205S–209S, doi:10.1111/j.1365-2125.1989.tb03483.x.
10. Jittamala, P.; Pukrittayakamee, S.; Tarning, J.; Lindegardh, N.; Hanpithakpong, W.; Taylor, W.R.; Lawpoolsri, S.; Charunwattana, P.; Panapipat, S.; White, N.J.; et al. Pharmacokinetics of orally administered oseltamivir in healthy obese and nonobese Thai subjects. *Antimicrob Agents Chemother* **2014**, *58*, 1615–1621, doi:10.1128/AAC.01786-13.
11. Amrein, R.; Hetzel, W. Pharmacology of Dormicum (Midazolam) and Anexate (Flumazenil). *Acta Anaesth Scand* **1990**, *34*, 6–15, doi:DOI 10.1111/j.1399-6576.1990.tb03174.x.
12. Breimer, L.T.; Hennis, P.J.; Burm, A.G.; Danhof, M.; Bovill, J.G.; Spierdijk, J.; Vletter, A.A. Pharmacokinetics and EEG effects of flumazenil in volunteers. *Clin Pharmacokinet* **1991**, *20*, 491–496, doi:10.2165/00003088-199120060-00005.
13. Mather, L.E.; Tucker, G.T.; Pflug, A.E.; Lindop, M.J.; Wilkerson, C. Meperidine kinetics in man. Intravenous injection in surgical patients and volunteers. *Clin Pharmacol Ther* **1975**, *17*, 21–30, doi:10.1002/cpt197517121.
14. Verbeec, R.K.; Branch, R.A.; Wilkinson, G.R. Meperidine disposition in man: influence of urinary pH and route of administration. *Clin Pharmacol Ther* **1981**, *30*, 619–628, doi:10.1038/clpt.1981.213.
15. Klotz, U.; McHorse, T.S.; Wilkinson, G.R.; Schenker, S. The effect of cirrhosis on the disposition and elimination of meperidine in man. *Clin Pharmacol Ther* **1974**, *16*, 667–675, doi:10.1002/cpt1974164667.
16. Neal, E.A.; Meffin, P.J.; Gregory, P.B.; Blaschke, T.F. Enhanced Bioavailability and Decreased Clearance of Analgesics in Patients with Cirrhosis. *Gastroenterology* **1979**, *77*, 96–102, doi:10.1016/s0016-5085(79)80017-7.
17. Sheng, X.Y.; Liang, Y.; Yang, X.Y.; Li, L.E.; Ye, X.; Zhao, X.; Cui, Y.M. Safety, pharmacokinetic and pharmacodynamic properties of single ascending dose and continuous infusion of remimazolam besylate in healthy Chinese volunteers. *Eur J Clin Pharmacol* **2020**, *76*, 383–391, doi:10.1007/s00228-019-02800-3.
